# Supplementary material for: Bacterial RadA is a DnaB-type helicase interacting with RecA to promote bidirectional D-loop extension
Source: PubMed Central journal article supplement (PMC5512693; doi:10.1038/ncomms15638), 2017-05-31
Supplement: ncomms15638-s1.pdf [file ncomms15638-s1.pdf]

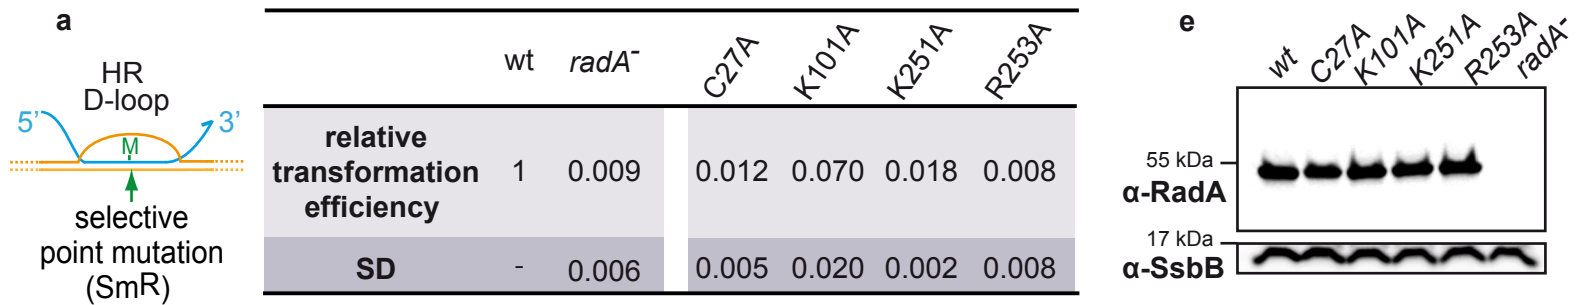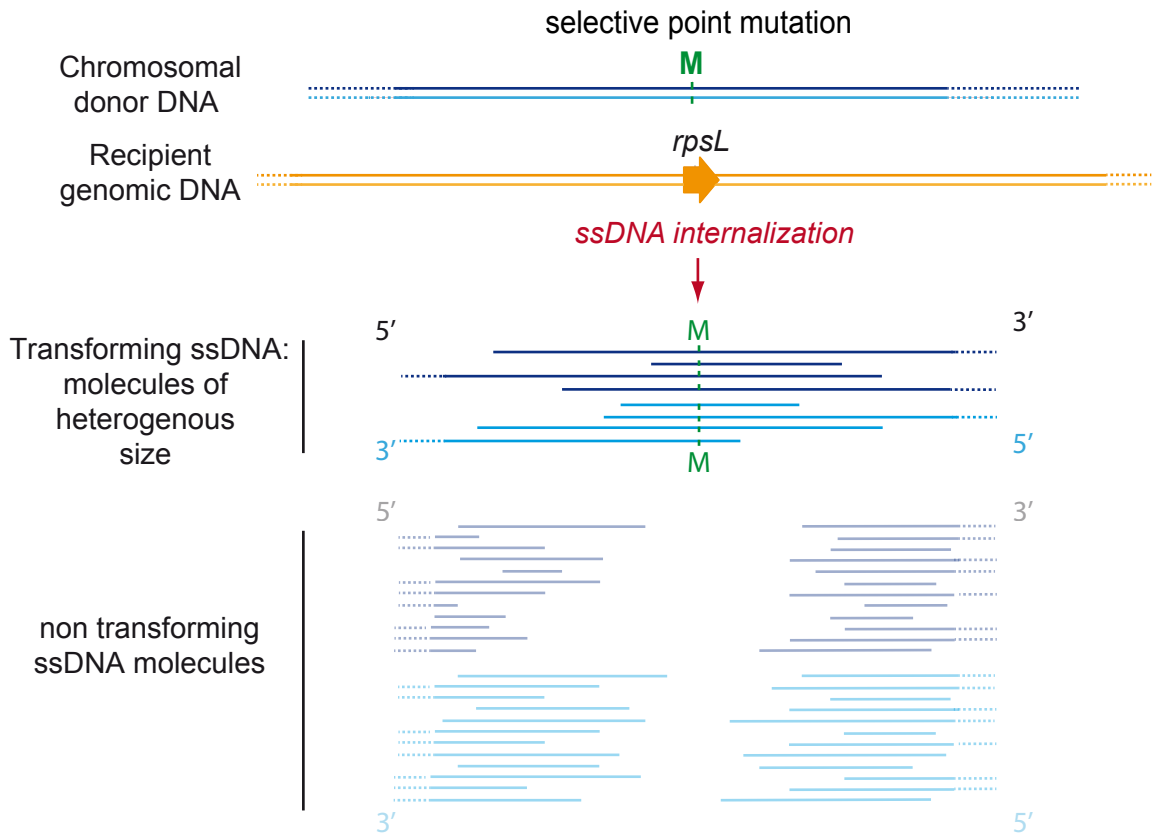

**c**

|                                              | PCRc<br>(ng.mL <sup>-1</sup> ) | 300  | 30 | 3    |
|----------------------------------------------|--------------------------------|------|----|------|
| % of transformation (SmR)                    |                                |      |    |      |
| <i>wild-type</i> strain                      |                                | 87.5 | 66 | 18.6 |
| <i>radA</i> <sup>-</sup> strain              |                                | 3.5  | 1  | 0.13 |
| transformation deficit of <i>radA</i> mutant |                                |      |    |      |
|                                              |                                | 25   | 66 | 143  |

**d**

| Donor PCR molecules                          | PCRc | PCRe |                                              | PCRc | PCRe  |       |
|----------------------------------------------|------|------|----------------------------------------------|------|-------|-------|
| % of transformation (NovR)                   |      |      | % of transformation (Rif <sup>R</sup> )      |      |       |       |
| <i>wild-type</i> strain                      | 88   | 31   | (2.8)                                        | 100  | 35    | (2.8) |
| <i>radA</i> <sup>-</sup> strain              | 5.7  | 0.06 | (95)                                         | 3.8  | 0.028 | (136) |
| transformation deficit of <i>radA</i> mutant |      |      | transformation deficit of <i>radA</i> mutant |      |       |       |
|                                              | 15   | 516  |                                              | 28   | 1250  |       |

**Supplementary Figure 1. Effect of RadA deletion and of point mutations in the C4 and H domains on pneumococcal transformation.**

(a) Relative transformation efficiencies of *radA* point mutants compared to wild type (normalized to 1) were measured using chromosomal donor DNA carrying a streptomycin resistance point mutation ( $Sm^R$ ) in the *rpsL* gene. SD: standard deviation of the mean calculated from triplicate repeats. (b) Schematic representation of transforming (bold) and non-transforming ssDNA fragments internalized during transformation with chromosomal DNA: a large majority of ssDNA fragments internalized by competent cells are non-transforming ssDNA; transforming ssDNA molecules arising from the two strands, depicted in dark and light blue, are of undefined size and the position of the mutation on these fragments is random. The transformation frequency can reach 10% with a saturating amount of chromosomal donor molecules and 100% with PCR fragments (panel d, below), indicating that all cells in the population can be transformed. In the absence of RadA, the transformation frequency drops to 0.1% with chromosomal donor DNA, showing that RadA helps the incorporation of unbiased transforming ssDNA molecules. (c) Transformation frequencies obtained for *radA*<sup>-</sup> (R2194) and its parental strain (R1818) with various concentrations of PCRc carrying a point mutation conferring  $Sm^R$ . See also Figure 1. (d) Transformation frequencies obtained for *radA*<sup>-</sup> (R2194) and of its parental strain (R1818) with PCRc or PCRe products (30 ng.ml<sup>-1</sup>) homologous to the *gyrB* locus and carrying a point mutation conferring novobiocin resistance ( $Nov^R$ ) or to the *rpoB* locus and carrying a point mutation conferring rifampicin resistance ( $Rif^R$ ). The numbers in parenthesis refer to the relative deficit of transformation between PCRc and PCRe donors for the same strain. Transformation frequencies were measured in three independent experiments, leading to similar relative differences between PCRe and PCRc fragment transformation efficiency. (e) Western blot analysis of total cell extracts prepared from pneumococcal wild type and *radA* competent cells, using antibodies raised against pneumococcal RadA. The competence-induced SsbB protein was detected as control using antibodies raised against SsbB.

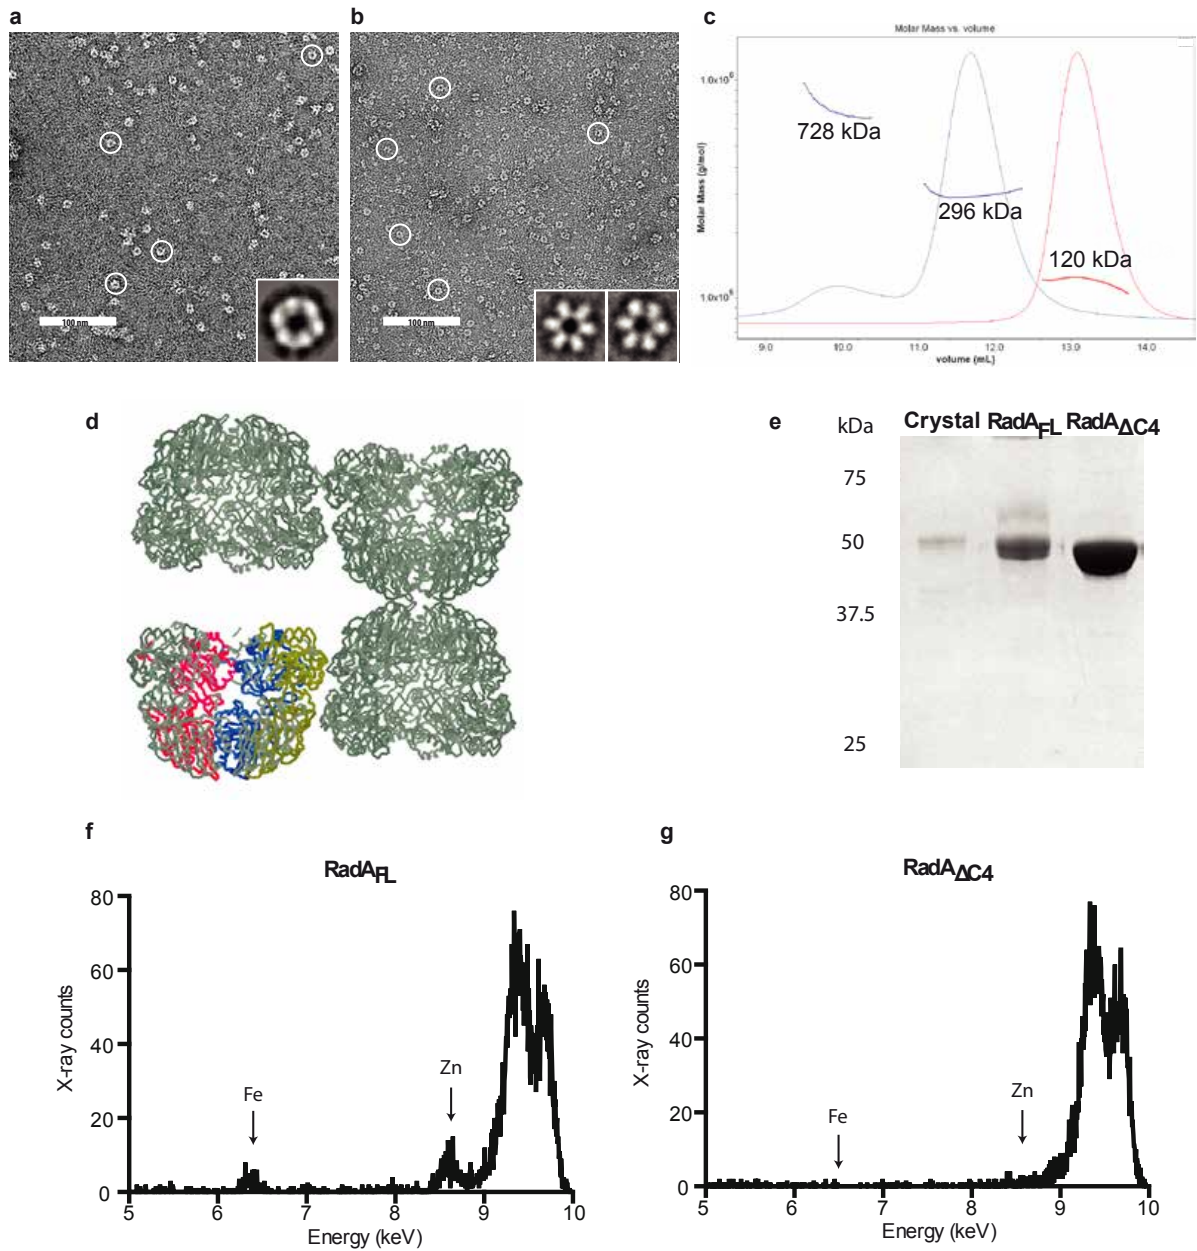

**Supplementary Figure 2. Pneumococcal RadA forms hexamers and multimers in solution and has a functional Zinc finger.**

(a-b) Negatively stained EM images of RadA<sub>FL</sub> (a) and of RadA<sub>P</sub> (b). (a) The inset shows the 2D class average of 340 particles RadA<sub>FL</sub> self-assembled into ring-shaped hexamers. (b) RadA<sub>P</sub> self-assembles into ring-shaped hexamers. The 2D averages show two possible conformations of the RadA<sub>P</sub> hexamer: open (left, n=5) and closed (right, n=50), the latter being the most

abundant species observed on the grid. **(c)** MALS/QELS/UV/RI analysis of RadA<sub>FL</sub> (blue) and of the RadA<sub>P</sub> domain (red), with the respective molecular weights calculated using ASTRA software. The predicted molecular weights of the hexamers of RadA<sub>FL</sub> and RadA<sub>P</sub> are 295.8 and 127.7 kDa respectively. **(d)** Crystal packing of RadA<sub>FL</sub>. A large gap is present between hexamers in the crystal packing of RadA<sub>FL</sub>. **(e)** RadA<sub>FL</sub> crystal content analysis. 12% SDS gel electrophoresis of a dissolved crystal of RadA<sub>FL</sub> (Crystal), and of the RadA<sub>FL</sub> and RadA<sub>ΔC4</sub> protein samples prior crystallization. **(f-g)** XRF spectra of RadA<sub>FL</sub> (f) and RadA<sub>ΔC4</sub> (g), reveal the presence of Zn and Fe only in RadA<sub>FL</sub>, demonstrating that the C4 domain of RadA is a zinc-binding motif and that the C4 domain is present but not ordered in the RadA<sub>FL</sub> crystal.

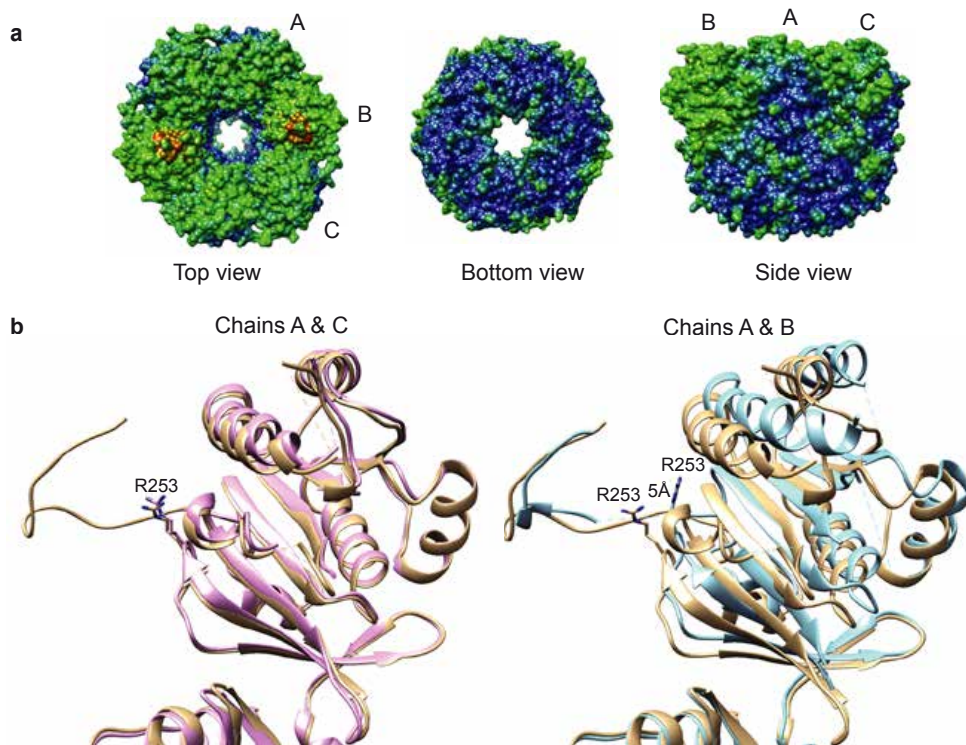

**Supplementary Figure 3. The H domain of RadA is flexible.**

(a) B factor distribution in the RadA<sub>FL</sub> hexamer. B factors reflect structural heterogeneity and disorder. The RadA<sub>P</sub> domain of all protomers in the hexamer has the lowest B factor values, ranging from 56 to 217 (blue to green). The H and C4 domains have higher B factors, ranging from 217 to 378 (green to red). In particular, chain B of the trimeric unit of RadA<sub>FL</sub> in the crystal appears to have the highest B factor and thus contains the most residues of uncertain position.

(b) The RadA H domain overlaps perfectly with the three monomers of the trimeric unit. When the RadA H domains are aligned, those of chains A (taupe) and C (pink) overlap well (RMSD between 372 atom pairs is 0.831 Å), whereas those of chains A (taupe) and B (blue) are shifted by 5 Å (RMSD between 208 atom pairs is 0.739 Å).

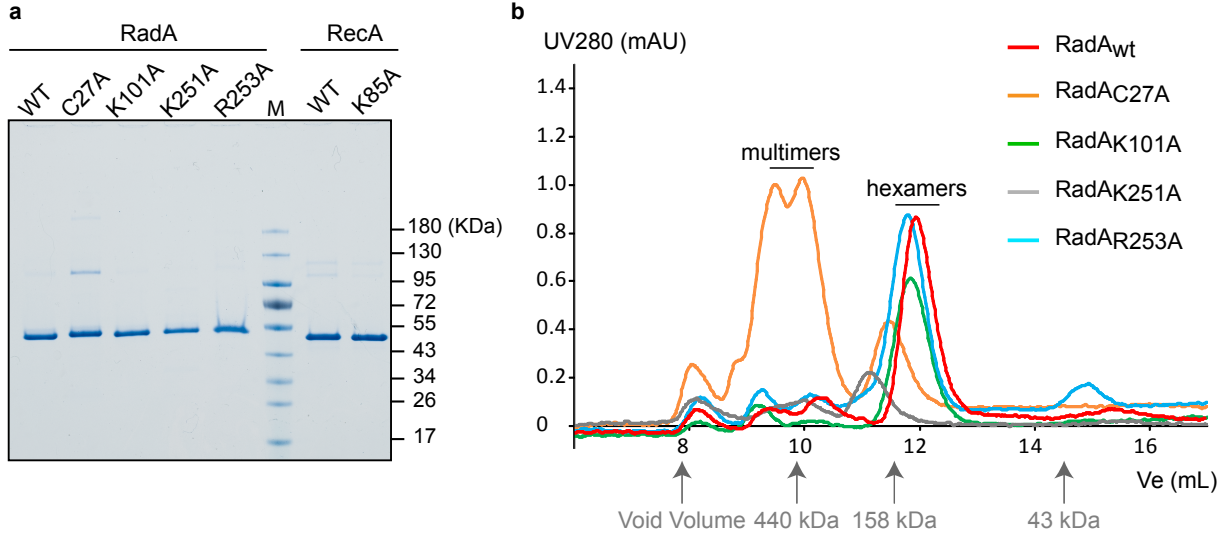

**c**

|                                    | RadA <sub>wt</sub><br>+ ssDNA | RadA <sub>wt</sub><br>+ dsDNA | RadA <sub>wt</sub><br>no DNA | RadAC27A<br>+ ssDNA | RadAK101A<br>+ ssDNA | RadAK251A<br>+ ssDNA | RadAR253A<br>+ ssDNA |
|------------------------------------|-------------------------------|-------------------------------|------------------------------|---------------------|----------------------|----------------------|----------------------|
| <i>Best-fit and Standard Error</i> |                               |                               |                              |                     |                      |                      |                      |
| V <sub>max</sub>                   | 4.79 (0.19)                   | 0.99 (0.05)                   | 0.1 (0.01)                   | 6.48 (0.33)         | 0.75 (0.04)          | 0.24 (0.03)          | N.D *                |
| K <sub>m</sub>                     | 0.15 (0.03)                   | 0.19 (0.04)                   | 0.06 (0.06)                  | 0.22 (0.05)         | 0.35 (0.06)          | 0.32 (0.15)          | N.D *                |

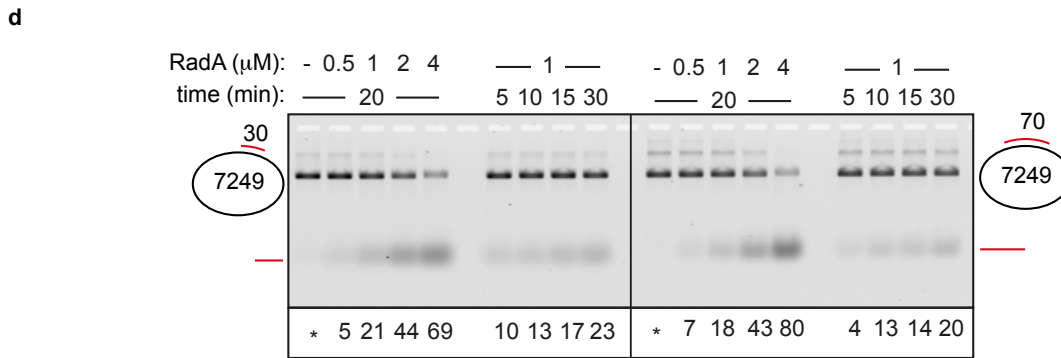

**Supplementary Figure 4. Purification of RadA and RecA derivatives and ATPase activity of RadA proteins.**

(a) Purified RadA and RecA proteins subjected to SDS-PAGE and revealed by Coomassie blue staining. A minor species in the RadA<sub>C27A</sub> preparation migrates at the position expected for a dimer of RadA; the tendency of this RadA mutant to self-assemble in the form of multimers (see also b) is consistent with this band being a dimer form. (b) Gel filtration analysis of purified RadA on a Superdex200 analytical sizing column. The calibration of the column performed with purified protein standards is indicated as grey numbers below the elution chromatogram. (c) ATPase activity of RadA derivatives.  $V_{max}$  and  $K_m$  values were calculated from the data of Figure 4 using Michaelis-Menten analysis and best-fit. Standard error values were calculated using GraphPad-Prism 7 software from the data of three independent experiments. N.D \*: not determined, since the ATPase activity of RadA<sub>R253A</sub> was too weak to fit a Michaelis-Menten curve. (d) Helicase assays performed on M13mp18 ssDNA hybridized either with a Cy3-fluorescent (red) 30-mer (left panel) or 70-mer (right panel). Both DNA substrates were submitted in parallel to increasing amount of RadA (0.5 to 4  $\mu$ M) for 20 min or to a fixed RadA concentration (1  $\mu$ M) for 5 to 30 min. Values at the bottom of each lane correspond to the relative % of unwound Cy3-oligonucleotide (detailed in methods). (\*) corresponds to the reference lane, without protein .

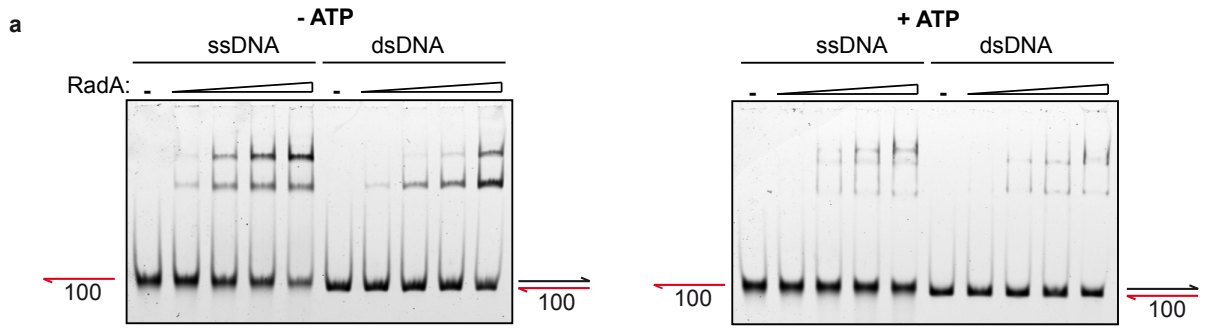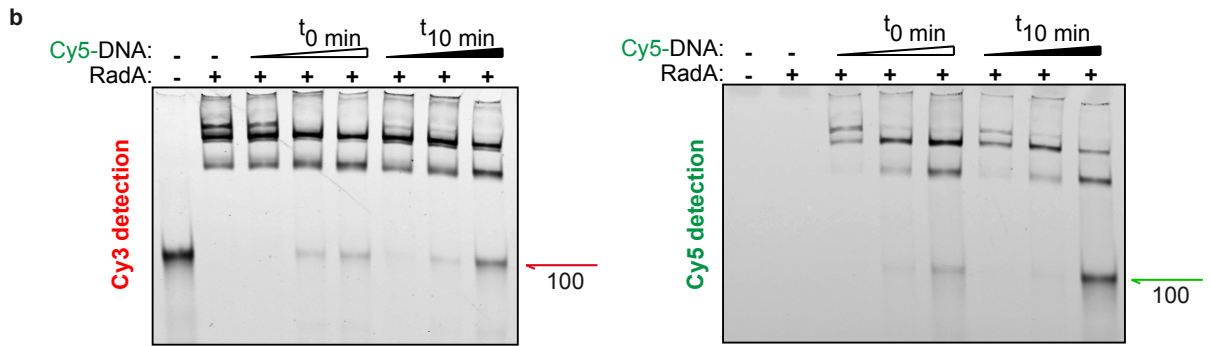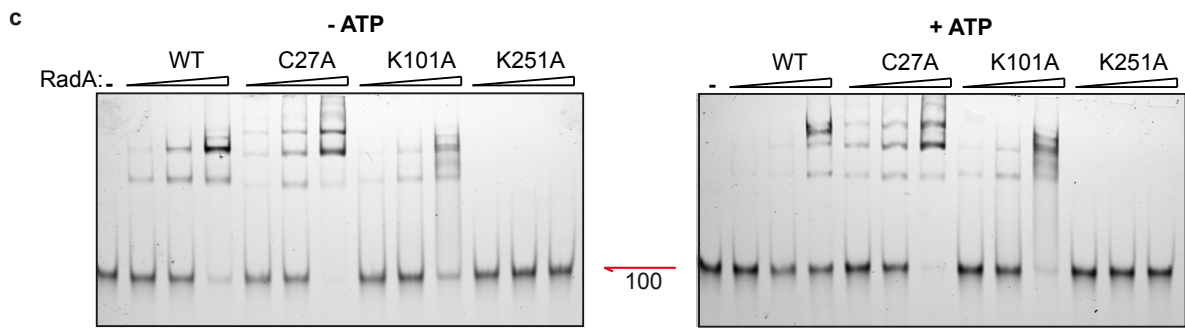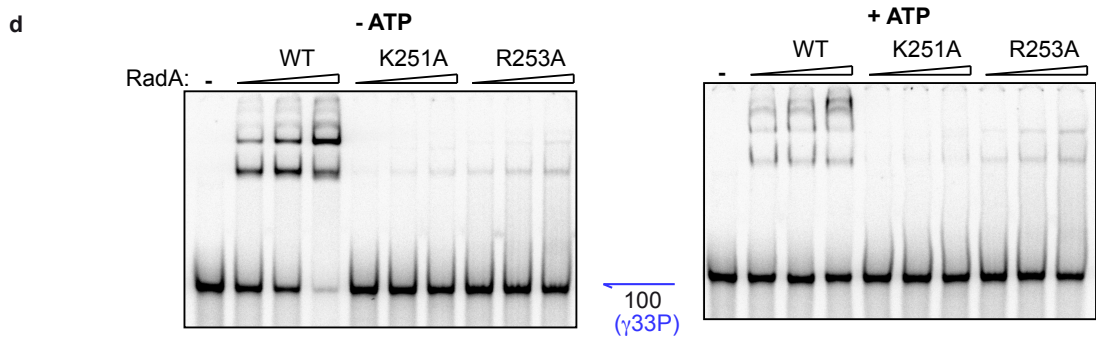



**Supplementary Figure 5. Electrophoretic mobility Shift Assay (EMSA) of ssDNA and dsDNA binding by RadA derivatives.**

(a) EMSA performed with 50, 250, 500 and 750 nM of RadA and 100 nt long Cy3-labelled ssDNA or dsDNA, in the absence (left) or presence (right) of ATP. (b) EMSA performed with 750 nM of RadA and 10 nM Cy3-labelled ssDNA (100 nt) in the presence of 5, 10 or 20 nM of Cy5-labelled ssDNA (100 nt) added either at the same time ( $t_0$  min) or after 10 min of incubation ( $t_{10}$  min) followed by further incubation for 10 min. The same gel was used to detect Cy3- (left) or Cy5- (right) specific fluorescent signals. The patterns observed by adding increasing amounts of Cy5-ssDNA to RadA pre-bound or not to Cy3-ssDNA are nearly identical. This shows that RadA interaction with the two ssDNA probes equilibrates between them rapidly. (c) EMSA performed with 80, 250 and 750 nM of wild-type and mutant RadA proteins in the absence (left) or presence (right) of ATP, with Cy3-ssDNA (100 nt). (d) As in (c), but with  $^{33}\text{P}$ -radio-labelled ssDNA instead of Cy3 ssDNA, to investigate ssDNA binding of wild-type RadA in comparison with RadA<sub>K251A</sub> and RadA<sub>R253A</sub> mutants (150, 300 and 600 nM). In this assay, which provides a more sensitive detection of labeled ssDNA, RadA<sub>K251A</sub> and RadA<sub>R253A</sub> mutants are seen to be strongly affected but not completely defective in ssDNA binding. See also Figure 4.

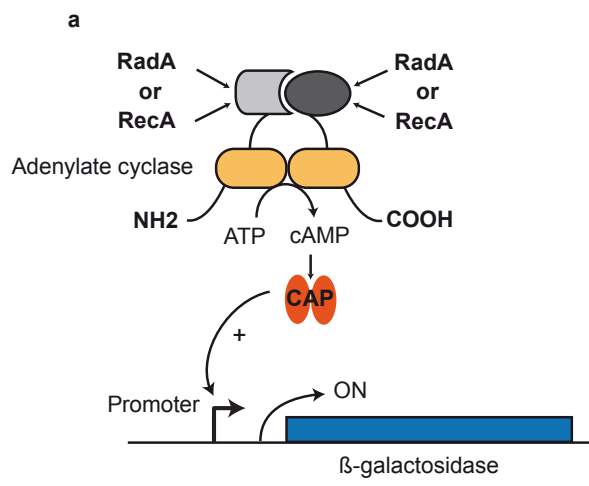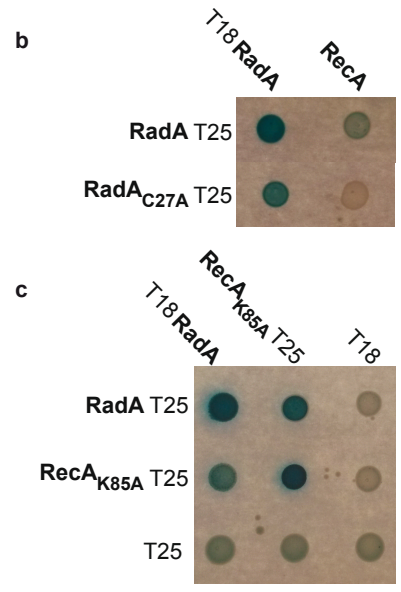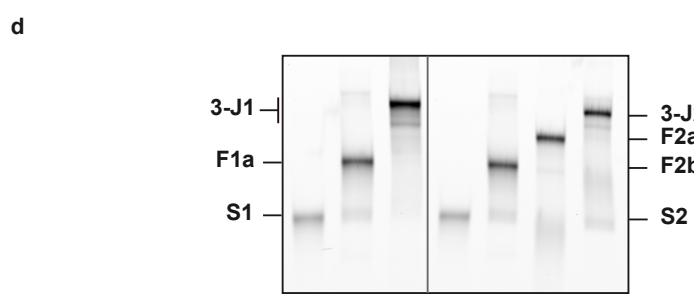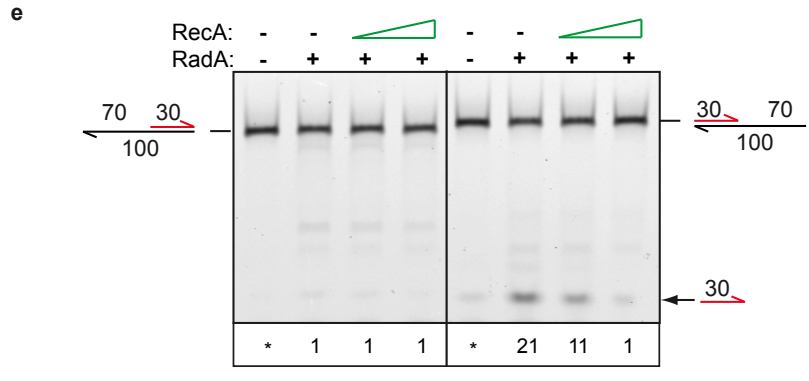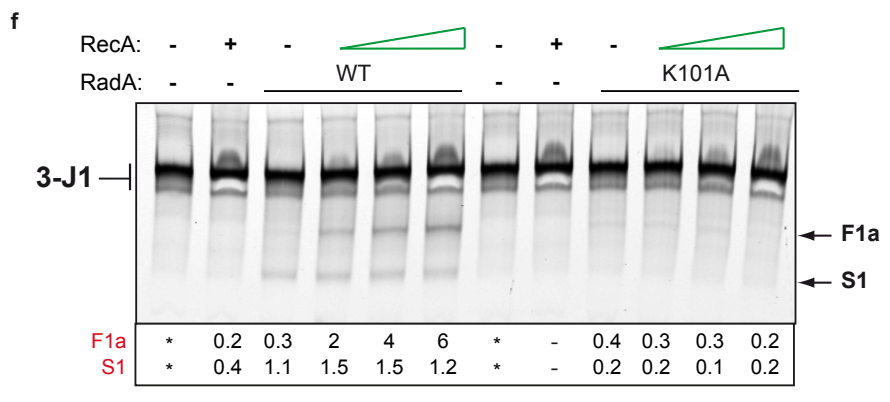

### Supplementary Figure 6. Interplay between RadA and RecA.

(a) Scheme of the BacTH assay. BTH101 *E. coli* cells, lacking endogenous  $\beta$ -galactosidase and expressing RadA and RecA fused to either the T18 or T25 domain of Bordetella adenylate cyclase, were tested for  $\beta$ -galactosidase expression on plates supplemented with IPTG and the chromogenic substrate X-Gal. If able to interact, the pair of fusion proteins tested reconstitutes adenylate cyclase to generate cAMP, which then activates the cAMP-bound catabolite activator protein (CAP) to induce the expression of  $\beta$ -galactosidase. A positive interaction between two fusion proteins is scored by the appearance of blue color in the colony due to the breakdown of X-gal in the medium. (b-c) BacTH assay of with wild-type or mutated RadA and wild-type RecA (b) or with wild-type RadA and the RecA<sub>K85A</sub> mutant (c). See also Figure 5. (d) Gel migration profiles of 3-J and derivatives. (e) Helicase assays of RadA (750 nM) and with increasing amounts of RecA (300 and 600 nM) on a 3' (left panel) or 5' (right panel) tailed duplex Cy3-labeled on one strand (depicted in red; Supplementary Fig.8).

(f) Helicase assay performed with 750 nM of wild-type RadA and RadA<sub>K101A</sub> mutant proteins on 3-J1, in presence of 150, 300 and 600 nM RecA and ATP. Values at the bottom of each lane in (e-f) correspond to the relative % of unwound Cy3-oligonucleotide (detailed in methods). (\*) corresponds to the reference lane, without protein.



### Supplementary Figure 7. Sequence analysis of RadA proteins.

(a) Distribution of RadA among prokaryotic and eukaryotic species. A non-exhaustive unrooted phylogenetic tree of RadA is presented. It is based on the alignment of 140 protein sequences from annotated RadA genes picked randomly as representative of 24 bacterial phyla or from the Eukaryota domain on NCBI database (<http://www.ncbi.nlm.nih.gov>). RadA was absent from 2 bacterial phyla (Lentisphaerae and Tenericutes). The red arrow points to RadA from *S. pneumoniae*. All eukaryotic RadAs included in the tree share at least 40% identity with *S. pneumoniae* RadA and comprise the three domains C4, H, P (Fig. 1a). Sequence alignment was completed with Clustal Omega (<http://www.ebi.ac.uk/Tools/msa/clustalo/>) and the tree was constructed using the Neighbor Joining method and formatted with the iTOL online tool (<http://itol.embl.de>). (b) Sequence alignment of the helicase domains from *E. coli* DnaB and T7 Gp4 along with the H domain of *S. pneumoniae* RadA; “\*”, fully conserved residues; “:”, residues from groups with very similar properties; “.” residues from groups with weakly similar properties. The five SF4-motifs defining the H domains of the DnaB subfamily of SF4 helicases are highlighted in green; the consensus sequences for these motifs from 100 bacterial RadA proteins, together with the KNRFG motif, are shown in blue with strictly conserved residues in capital letters. (c) The conservation coloring profile as calculated by the ConSurf server (Landau et al., 2005) mapped onto the surface representation of the RadA structure. Conserved residues (maroon) cluster at the nucleotide-binding site, at the interface between the monomers in the hexamer and within the lumen of the R and P channels. Amino acids of average (white) and low (cyan) conservation are mostly located on the external surface of the ring, the dodecamerization interfaces and in the N-terminal loop.

**Short DNA substrates**

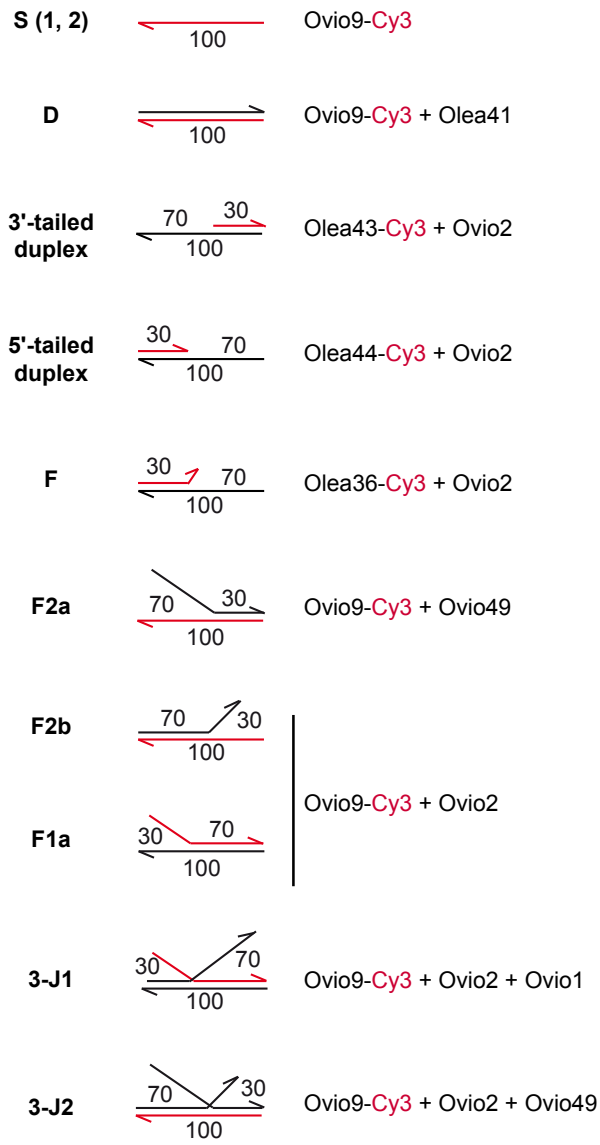

**Long DNA substrate**

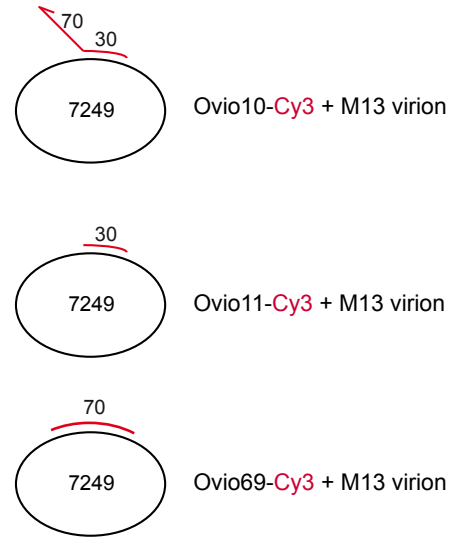

**Supplementary Figure 8. DNA substrates for RadA biochemical analysis**

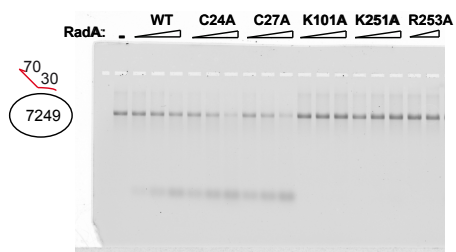

Gel related to Fig. 4c

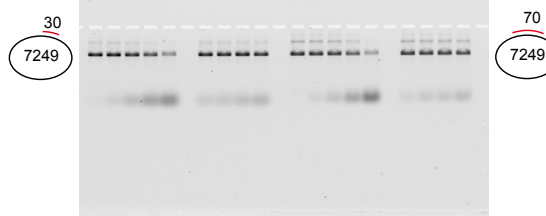

Gel related to Supplementary Fig. 4d

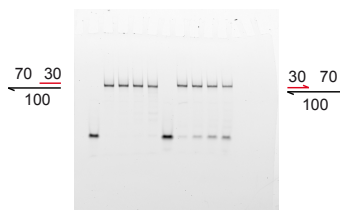

Gel related to Fig. 4e

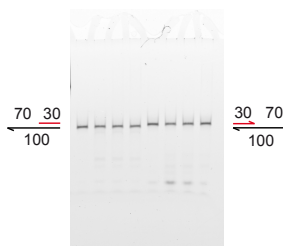

Gel related to Supplementary Fig. 6e

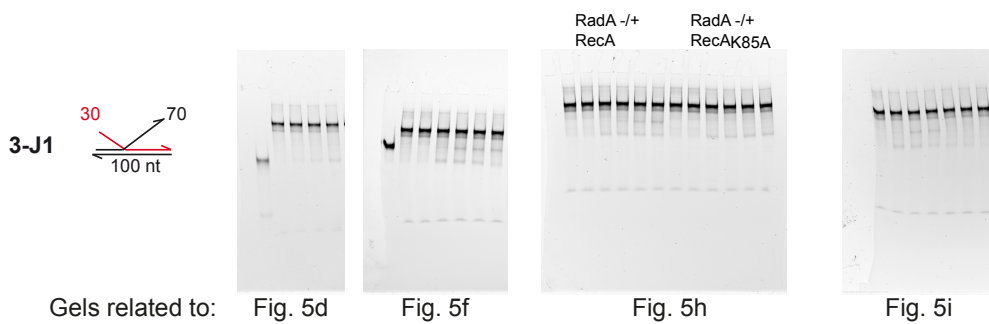

Gels related to:

Fig. 5d

Fig. 5f

Fig. 5h

Fig. 5i

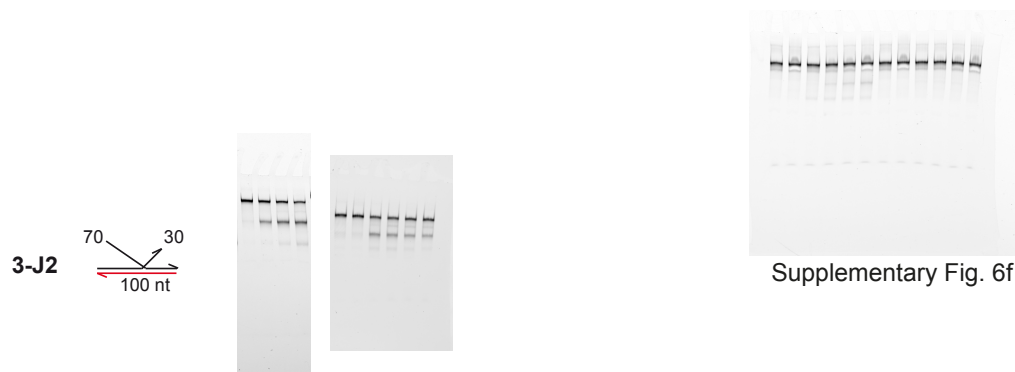

Gels related to: Fig. 5e

Fig. 5f

Supplementary Fig. 6f

**Supplementary Figure 9. Raw gel images**

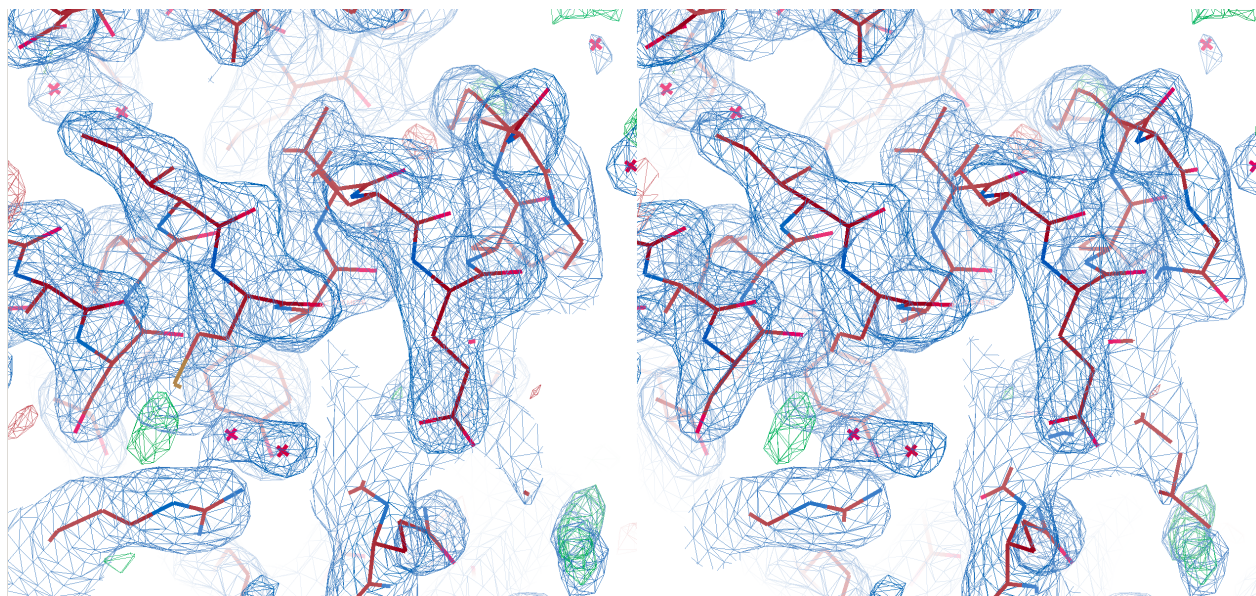

**Supplementary Figure 10. Stereo View of 5LKQ**

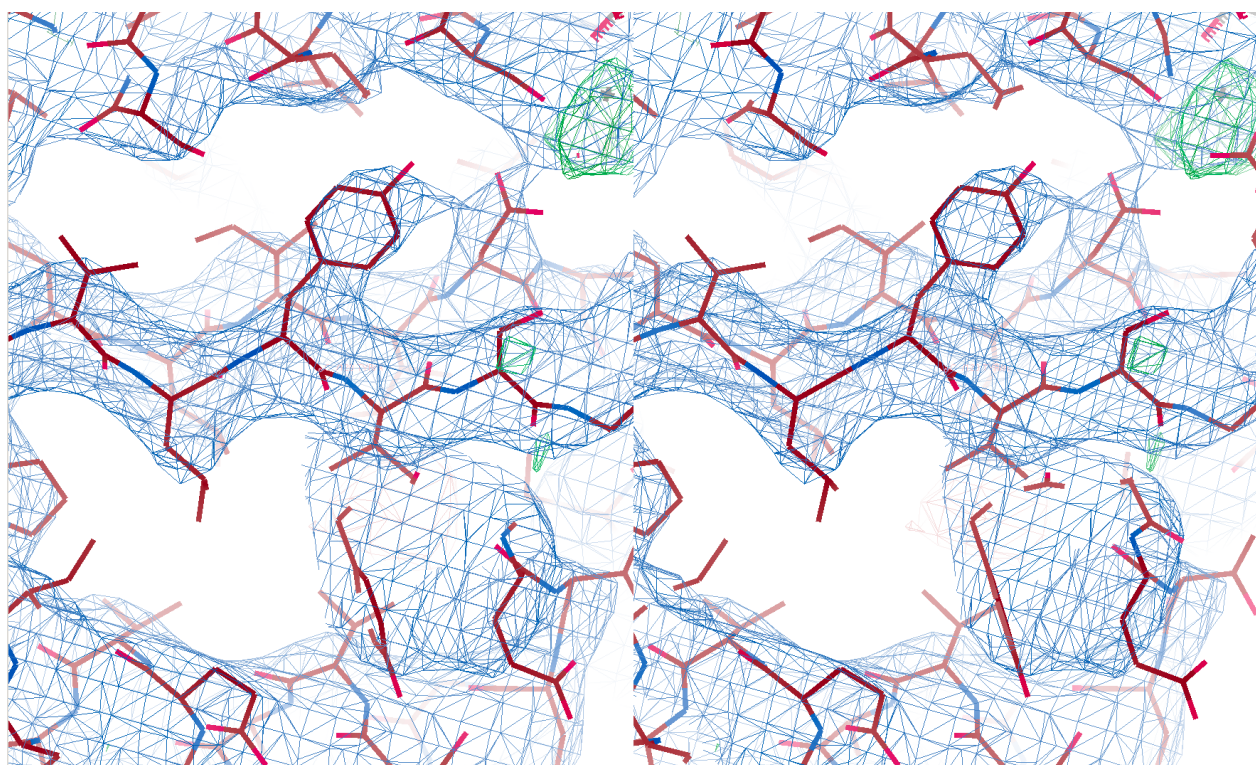

**Supplementary Figure 11. Stereo view of 5LKM**



| Primer (nt)     | Sequence (5' to 3')                                                                                          | Use in this work                            |
|-----------------|--------------------------------------------------------------------------------------------------------------|---------------------------------------------|
| MB117 (25)      | AATCTCCGCTGTAGGTCACCTTTCTT                                                                                   | <i>rpsL</i> PCRc<br>(3434 pb)               |
| MB120 (21)      | TTGGATTGGGTGTGCATTTGC                                                                                        |                                             |
| MB121 (23)      | ACATGGACCTTCAGAGAAAGCCT                                                                                      | <i>rpsL</i> PCRc<br>(4187 pb)               |
| MB132 (26)      | CCGCGTAAATCAAAGTAGAAAAATC                                                                                    |                                             |
| MB137 (23)      | CGTCTAGGACACGCATGTCAAGA                                                                                      | <i>rpoB</i> PCRc<br>(4195 pb)               |
| MB138 (21)      | GGCGGTAGACGGATTTGAACC                                                                                        |                                             |
| MB139 (24)      | TTCTTCTTGAATGGAGGGTTGAGC                                                                                     | <i>rpoB</i> PCRc<br>(3912 pb)               |
| MB140 (25)      | GTCCGTGAACGTATGTCTGTTCAAG                                                                                    |                                             |
| MB143 (23)      | CGACCTACCAAATCAATCGGATT                                                                                      | <i>gyrB</i> PCRc<br>(4114 pb)               |
| MB144 (27)      | GCCTTGAGAAAACGAAATGAATGGTTA                                                                                  |                                             |
| MB145 (24)      | GAAGAAAACAGGGTTCAACAACGG                                                                                     | <i>gyrB</i> PCRc<br>(3896 pb)               |
| MB146 (25)      | GGGTCCGGTGTGAAGTGAACAGTTG                                                                                    |                                             |
| OCN19 (49)      | ATCTATGGCCCAGAGTCATCTGGTGCTACAACGGTTGCCCT<br>TCATGCAG                                                        | <i>recA</i> <sub>K85A</sub><br>mutagenesis  |
| Olea07 (37)     | CCCCGGCCGTTATGCAAAGACCTTTTTCAAACCTTCC                                                                        | <i>radA</i> cloning                         |
| Olea12 (56)     | GGGAAGCTTGAAGGAGATTTGTCATGGCAAAGAAAAAAGC<br>GACATTTGTATGTCAA                                                 | <i>radA</i> cloning                         |
| Olea13 (52)     | GGTGGGGATCCTGGGATTGGGGCATCAACTCTTCTCCTAC<br>AAGTCTCAACCC                                                     | <i>radA</i> <sub>K101A</sub><br>mutagenesis |
| Olea15 (43)     | CTGGGACGTTGCCCAACGCTGGGTCTTGGTCTTCTTTTGT<br>GG                                                               | <i>radA</i> <sub>C27A</sub><br>mutagenesis  |
| Olea27 (51)     | CGTATTTTGAGAGCGGTCAAATGCTTTTGGTTCCACTAAT<br>GAGATTGGG                                                        | <i>radA</i> <sub>R253A</sub><br>mutagenesis |
| Olea28 (50)     | CCTTTCGTATTTTGAGAGCGGTGCAAATCGTTTTGGTTCC<br>ACTAATGAG                                                        | <i>radA</i> <sub>K251A</sub><br>mutagenesis |
| Olea19 (23)     | CCAAGTCAATCGCAGGTTTCATCC                                                                                     | <i>radA</i> <sub>C27A</sub><br>SOEing PCR1  |
| Olea15 (43)     | CTGGGACGTTGCCCAACGCTGGGTCTTGGTCTTCTTTTGT<br>GG                                                               |                                             |
| Olea20' (18)    | GTTGGGGCAACGTCCCAG                                                                                           | <i>radA</i> <sub>C27A</sub><br>SOEing PCR2  |
| Olea23 (23)     | GCAGCCGACTGAGGTTCTCTACC                                                                                      |                                             |
| Olea36-Cy3 (37) | <b>Cy3</b> -CTAGGGTCGGATCCTCTAGACAGCTCCATGTCCAGTG                                                            | Ovio2 partial<br>complemental               |
| Olea41 (100)    | ACTTGATTCTGTCGCTACTGATTACGGTGCTGCTATCGATG<br>GTTTAAACGTCATAGACGATTACATTGCTATTACACAGGAAA<br>CAGCTATGACCATGATT | Ovio9-Cy3 full<br>complemental              |
| Olea43-Cy3      | <b>Cy3</b> -GCACCGTAATCAGTAGCGACAGAATCAAGT                                                                   | Ovio2 partial                               |

|                     |                                                                                                                          |                                                                              |
|---------------------|--------------------------------------------------------------------------------------------------------------------------|------------------------------------------------------------------------------|
| (30)                |                                                                                                                          | complemental                                                                 |
| Olea44-Cy3<br>(30)  | <b>Cy3</b> -CTAGGGTCGGATCCTCTAGACAGCTCCATG                                                                               | Ovio2 partial<br>complemental                                                |
| Ovio1 (100)         | CTAGGGTCGGATCCTCTAGACAGCTCCATGATCACTGGCAC<br>TGGTAGAATTCGGCCCATTAGCAAGGCCGGAAACGTCACC<br>CTCCAGTTTCTCGCCTCTG             | Ovio2 partial<br>complemental                                                |
| Ovio2 (100)         | ACTTGATTCTGTGCTACTGATTACGGTGCTGCTATCGATG<br>GTTTAAACGTCATAGACGATTACATTGCTACATGGAGCTGTCT<br>AGAGGATCCGACCCTAG             | Ovio9-Cy3,<br>Ovio1,<br>Olea43-Cy3,<br>Olea44-Cy3<br>partial<br>complemental |
| Ovio8-Cy5<br>(100)  | ACTTGATTCTGTGCTACTGATTACGGTGCTGCTATCGATG<br>GTTTAAACGTCATAGACGATTACATTGCTAATTGTTATCCGCT<br>CACAATCCACACAACA- <b>Cy5</b>  | Chase<br>experiment                                                          |
| Ovio9-Cy3<br>(100)  | AATCATGGTCATAGCTGTTTCCTGTGTGAATAGCAATGTAAT<br>CGTCTATGACGTTAAACCATCGATAGCAGCACCGTAATCAG<br>TAGCGACAGAATCAAGT- <b>Cy3</b> | Olea41, Ovio2,<br>Ovio49 full or<br>partial<br>complemental                  |
| Ovio10-Cy3<br>(100) | AATCATGGTCATAGCTGTTTCCTGTGTGAAATCACTGGCAC<br>TGGTAGAATTCGGCCCATTAGCAAGGCCGGAAACGTCACC<br>CTCCAGTTTCTCGCCTCTG- <b>Cy3</b> | M13mp18<br>partial<br>complemental                                           |
| Ovio11-Cy3<br>(30)  | <b>Cy3</b> -AATCATGGTCATAGCTGTTTCCTGTGTGAA                                                                               | M13mp18 full<br>complemental                                                 |
| Ovio49 (100)        | CAGAGGCGAGAAACTGGAGGGTGACGTTTCCGGCCTTGCT<br>AATGGGCCGAATTCTACCAGTGCCAGTGATTTACACAGGA<br>AACAGCTATGACCATGATT              | Ovio9 partial<br>complemental                                                |
| Ovio69-Cy3<br>(70)  | <b>Cy3</b> -TCCCAGTCACGACGTTGTAAAACGACGGCCAGTGCC<br>AAGCTTGCATGCCTGCAGGTCGACTCTAGAGGAT                                   | M13mp18 full<br>complemental                                                 |
| <b>Strains</b>      | <b>Genotype</b>                                                                                                          | <b>Origin</b>                                                                |
| R1818               | <i>comC0</i> , <i>hexAΔ3::ermAM</i> ; Ery <sup>R</sup>                                                                   | <i>Caymaris et al., 2010</i>                                                 |
| R2194               | R1818 but <i>radA::spcR</i> (Burghout et al., 2007)                                                                      | <i>This study</i>                                                            |

**Supplementary Table 1. Oligonucleotides and strains used.**
